# Supplementary material for: Ndfip1 restricts Th17 cell potency by limiting lineage stability and proinflammatory cytokine production
Source: PubMed Central journal article supplement (PMC5209687; doi:10.1038/srep39649), 2017-01-04
Supplement: srep39649-s1.pdf [file srep39649-s1.pdf]

## Supplementary figures

Ndfip1 restricts Th17 cell potency by limiting lineage stability and proinflammatory cytokine production.

Awo Akosua Kesewa Layman<sup>1</sup>, Stephanie Sprout<sup>2</sup>, Dylan Phillips<sup>2</sup> and Paula M. Oliver<sup>2,3,\*</sup>

<sup>1</sup>Medical Scientist Training Program, Perelman School of Medicine and Biomedical Graduate Studies at the University of Pennsylvania, <sup>2</sup>The Children's Hospital of Philadelphia, Cell Pathology Division, <sup>3</sup>Department of Pathology and Laboratory Medicine, Perelman School of Medicine, University of Pennsylvania.

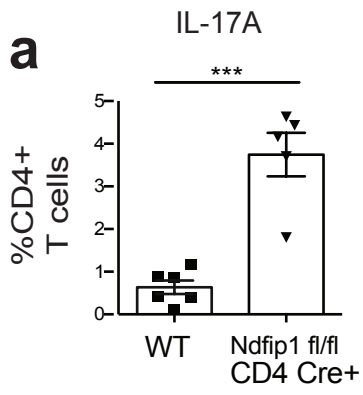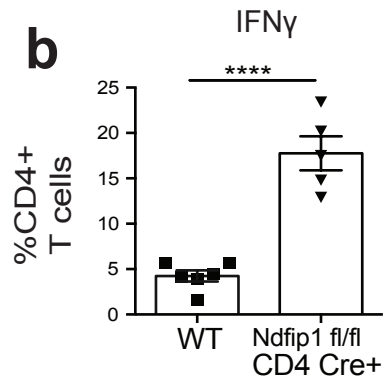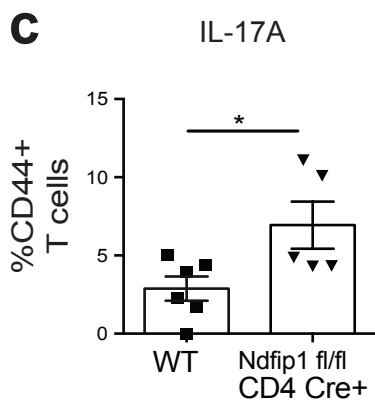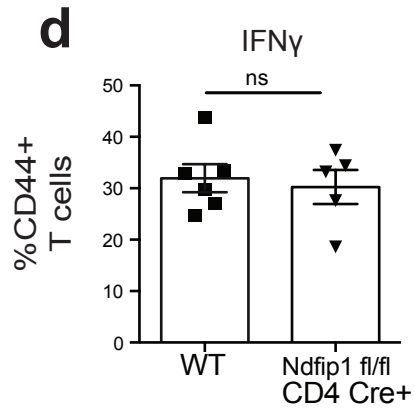

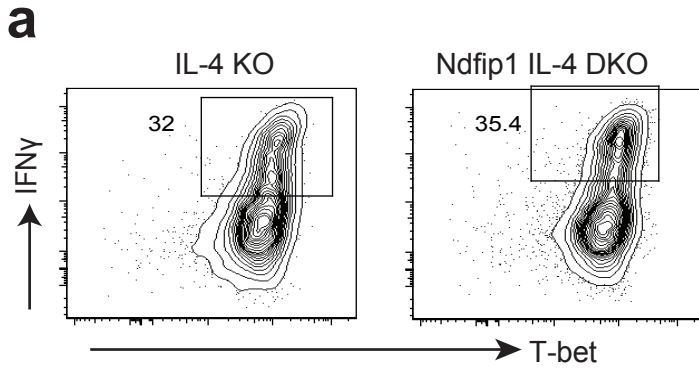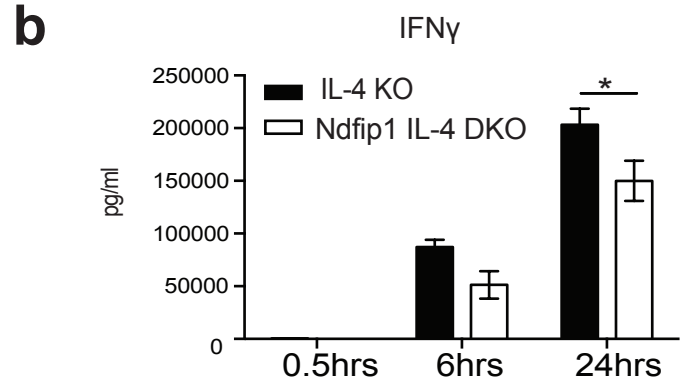

**a**

Ndfip1 fl/fl CD4 Cre- (WT)

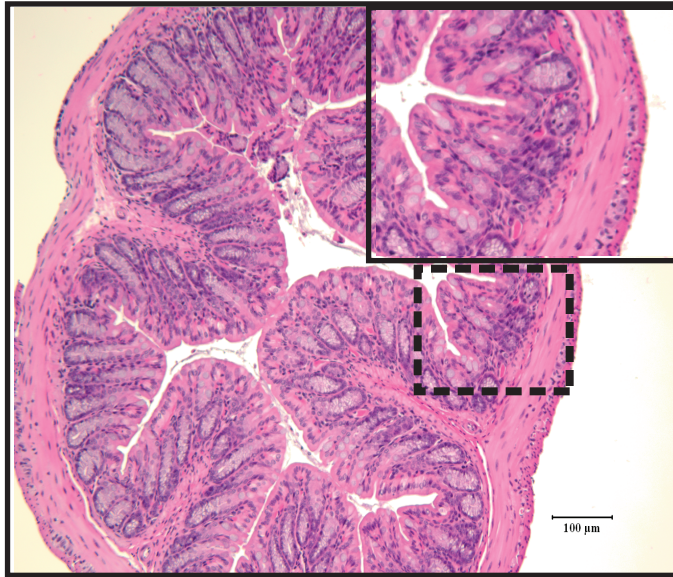

Ndfip1 fl/fl CD4 Cre+ (cKO)

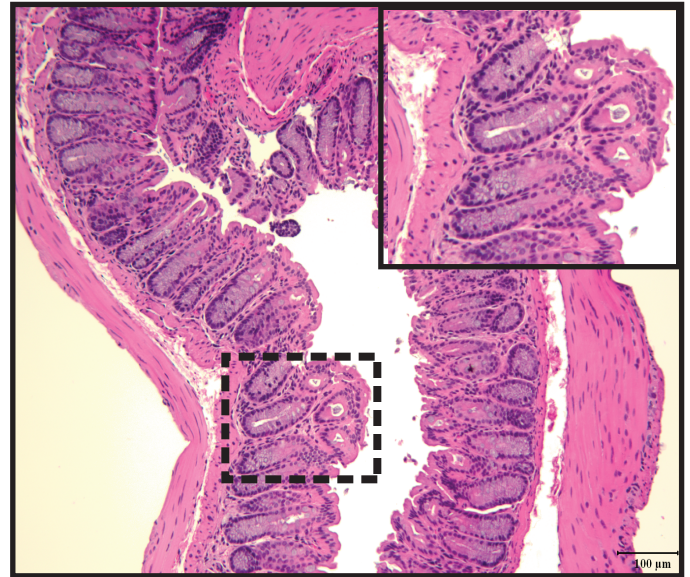**b**

Colon length

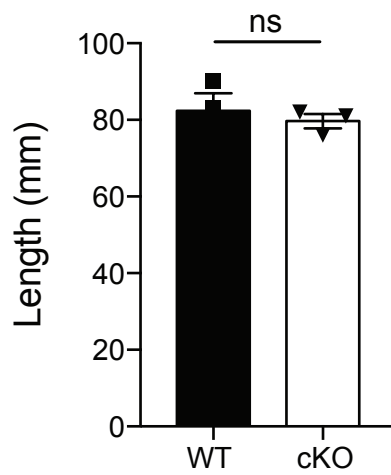**c**

Colon neutrophils

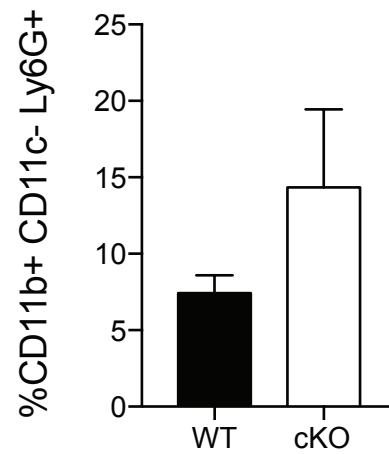



**a**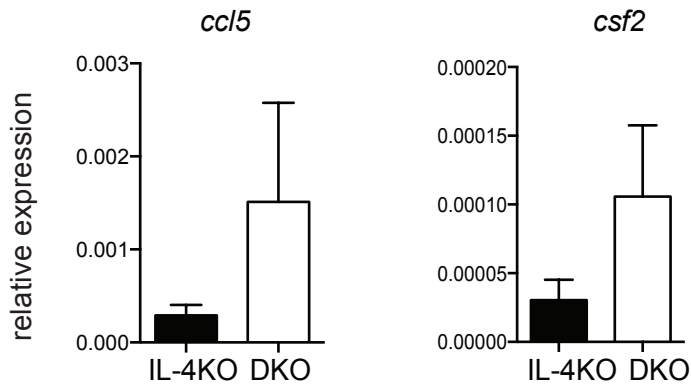**b**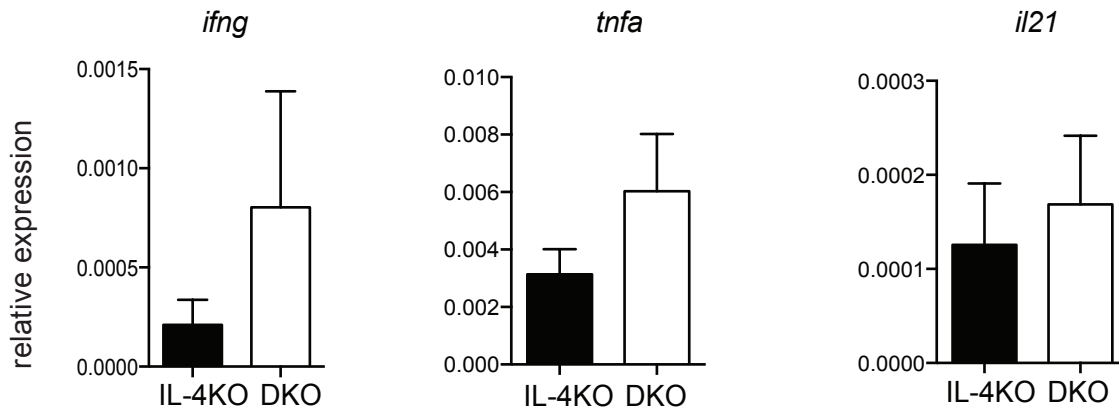**c**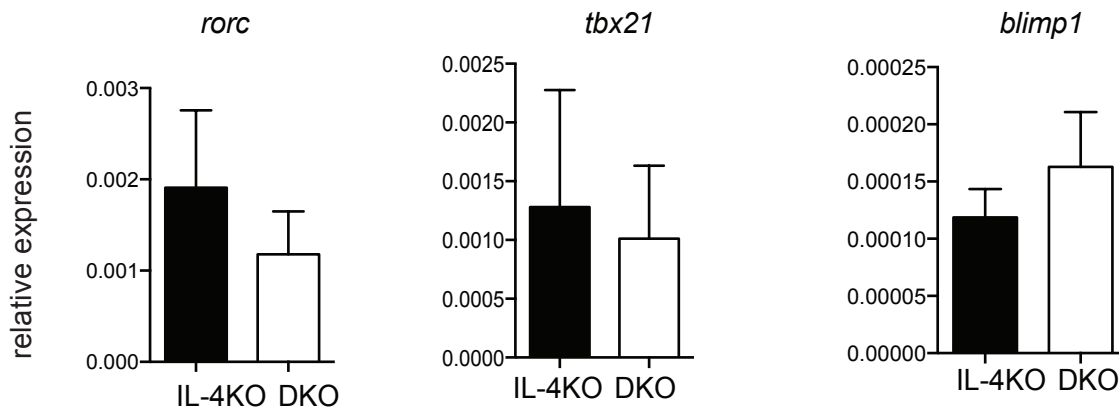

Supplementary Figure S1. Ndfip1 limits the abundance of Th17 cells.

Flow cytometric analysis of CD3<sup>+</sup> CD4<sup>+</sup> T cells among cells isolated from lungs of the wild type (Cre<sup>-</sup>) or Ndfip1 fl/fl CD4-Cre<sup>+</sup> (cKO) animals shown in Figure 1, but focused only on litter-matched Cre<sup>-</sup> and Cre<sup>+</sup> controls (i.e. litters in which Cre<sup>-</sup> and Cre<sup>+</sup> mice came from the same mothers). (a-b) Percentages of lung CD4<sup>+</sup> T cells that are IL-17A<sup>+</sup> (a) or IFN $\gamma$ <sup>+</sup> (b). (c-d) Percentages of CD44<sup>+</sup> CD4<sup>+</sup> cells that are IL-17A<sup>+</sup> (c) or IFN $\gamma$ <sup>+</sup> (d). n= 4 Cre<sup>-</sup> and n=5 Cre<sup>+</sup> in two independent experiments. \*p<0.05, \*\*p<0.01, \*\*\*\*p<0.0001. p values were calculated by unpaired two-tailed T tests. All error bars represent mean +/- SEM

Supplementary Figure S2. Ndfip1 does not restrain IFN $\gamma$  secretion from restimulated Th1 cells. (a) Representative plot showing Tbet<sup>+</sup> IFN $\gamma$ <sup>+</sup> Th1 cells after Th1 polarization and IL-2 expansion of IL-4<sup>-/-</sup> or Ndfip1 IL-4 DKO CD4<sup>+</sup> T cells. (b) Summary of IFN $\gamma$  ELISAs from plated Th1 cells. Data is pooled for n=2 Ndfip1 IL-4 DKO and n=3 IL-4<sup>-/-</sup> animals and is analyzed by 2-way ANOVA. \*p<0.05, \*\*p<0.01, \*\*\*p<0.001. Error bars represent mean +/- SEM

Supplementary Figure S3. Loss of Ndfip1 in T cells drives a spontaneous colitis in mice

(a) Colon histology of ten week old Ndfip1 fl/fl CD4 Cre<sup>+</sup> (cKO) or WT (Ndfip1 fl/fl Cre<sup>-</sup> or Ndfip1 fl/+ Cre<sup>-</sup>) animals showing evidence of spontaneous colon inflammation in cKO animals. Bars represent 100um and inset shows enlarged version of the boxed section of the image. (b) Ndfip1 fl/fl CD4 Cre<sup>+</sup> (cKO) and WT animals do not show differences in colon length. (c) Flow cytometry data indicating a trend towards increased CD11b<sup>+</sup> CD11c<sup>-</sup> Ly6G<sup>+</sup> neutrophils in the colons of Ndfip1 fl/fl CD4 Cre<sup>+</sup> (cKO) versus WT animals. Data is shown for an n= 3 Ndfip1 fl/fl CD4 Cre<sup>+</sup> and n=3 WT (Ndfip1 fl/fl Cre<sup>-</sup> or Ndfip1 fl/+ Cre<sup>-</sup>) animals at ten weeks old. All error bars represent mean +/- SEM

Supplementary Figure S4. Th17 cells lacking Ndfip1 show a gene expression profile associated with Th17 pathogenicity.

Naïve sorted CD4<sup>+</sup> T cells were differentiated into Th17 cells for 5 days. Cells were harvested and expanded in IL-2 for 3 days and then used for qPCR gene expression analysis shown here and also used in the ELISA studies in Figure 4. Data is shown for n=4 mice per genotype in 2 independent differentiation experiments. All error bars represent mean +/- SEM
